# Supplementary material for: Enhanced activity of electrocatalytic hydrogen evolution reaction by 2D/2D nanohybrids of ruthenate nanoflakes and graphitic carbon nitride
Source: Royal Society of Chemistry journal article supplement (doi:10.1039/d4cp02668c), 2024-01-01
Supplement: d4cp02668c1.pdf [file d4cp02668c1.pdf]

## *Electronic Supplementary Information*

### **Enhanced activity of electrocatalytic hydrogen evolution reaction by 2D/2D nanohybrids of ruthenate nanoflakes and graphitic carbon nitride**

Takayuki Ban\*, Kazuki Inukai, Chika Takai-Yamashita, and Kazuhiro Manseki

Department of Chemistry and Biomolecular Science, Gifu University, Yanagido 1-1, Gifu 501-1193, Japan

Corresponding author [\*]: [ban.takayuki.z6@f.gifu-u.ac.jp](mailto:ban.takayuki.z6@f.gifu-u.ac.jp)

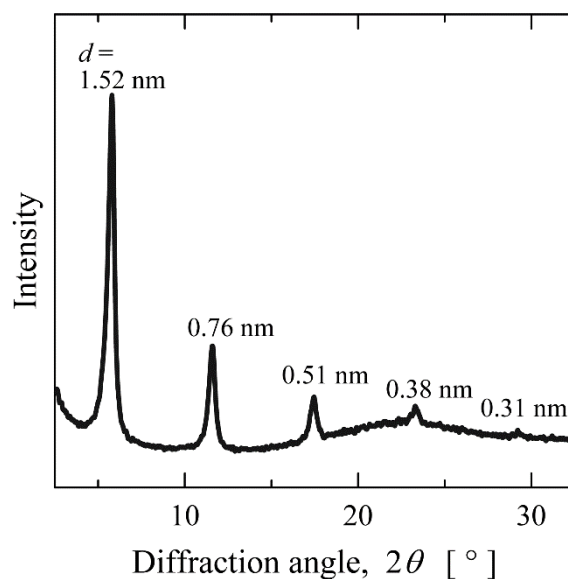

**Figure S1** XRD pattern of the thin film fabricated by drop-casting the aqueous sol of ruthenate nanoflakes on a glass substrate

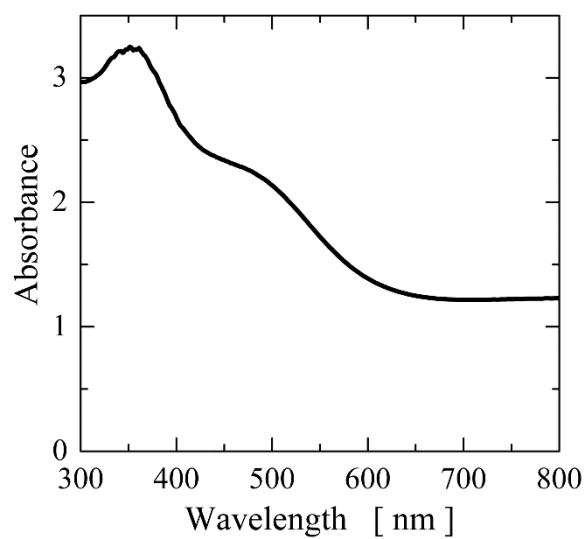

**Figure S2** UV-vis spectrum of the aqueous sol of ruthenate nanoflakes

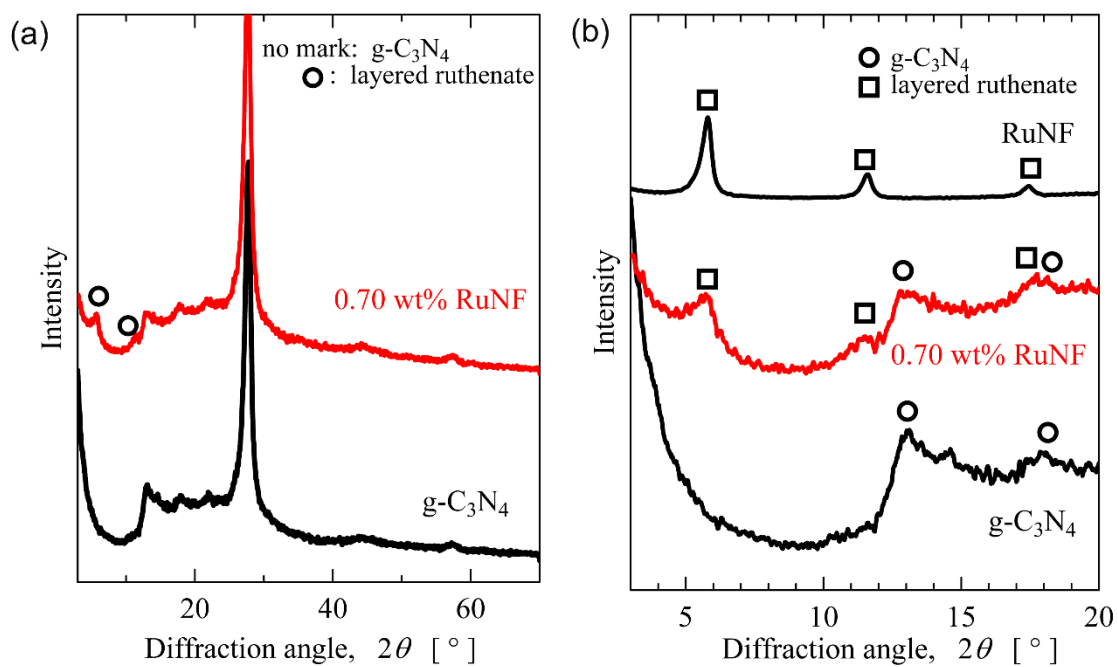

**Figure S3** XRD patterns of RuNF/ g-C<sub>3</sub>N<sub>4</sub> hybrid (0.70 wt% RuNF) and g-C<sub>3</sub>N<sub>4</sub> before washing with 2-propanol

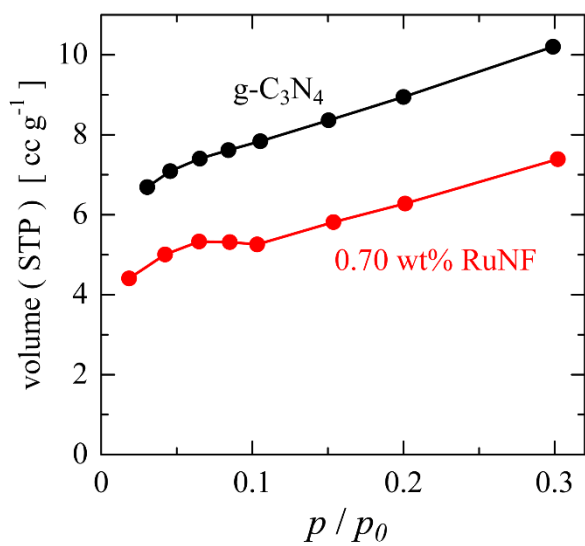

**Figure S4** Isotherms of N<sub>2</sub> adsorption at 77 K for g-C<sub>3</sub>N<sub>4</sub> powder and RuNF/ g-C<sub>3</sub>N<sub>4</sub> hybrid with a RuNF content of 0.70 wt%

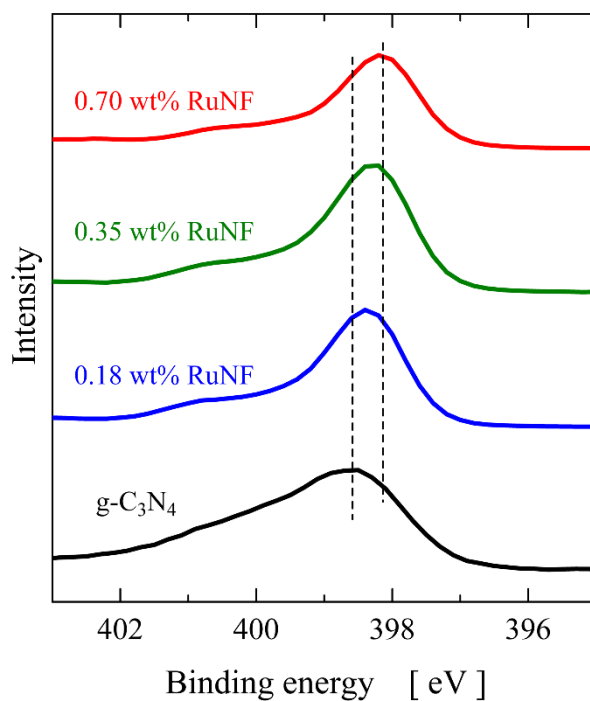

**Figure S5** XPS N1s spectra of g-C<sub>3</sub>N<sub>4</sub> powder and RuNF/ g-C<sub>3</sub>N<sub>4</sub> hybrids with RuNF contents of 0.18, 0.35, and 0.70 wt%. The vertical broken lines correspond to binding energies of 398.2 and 398.6 eV.

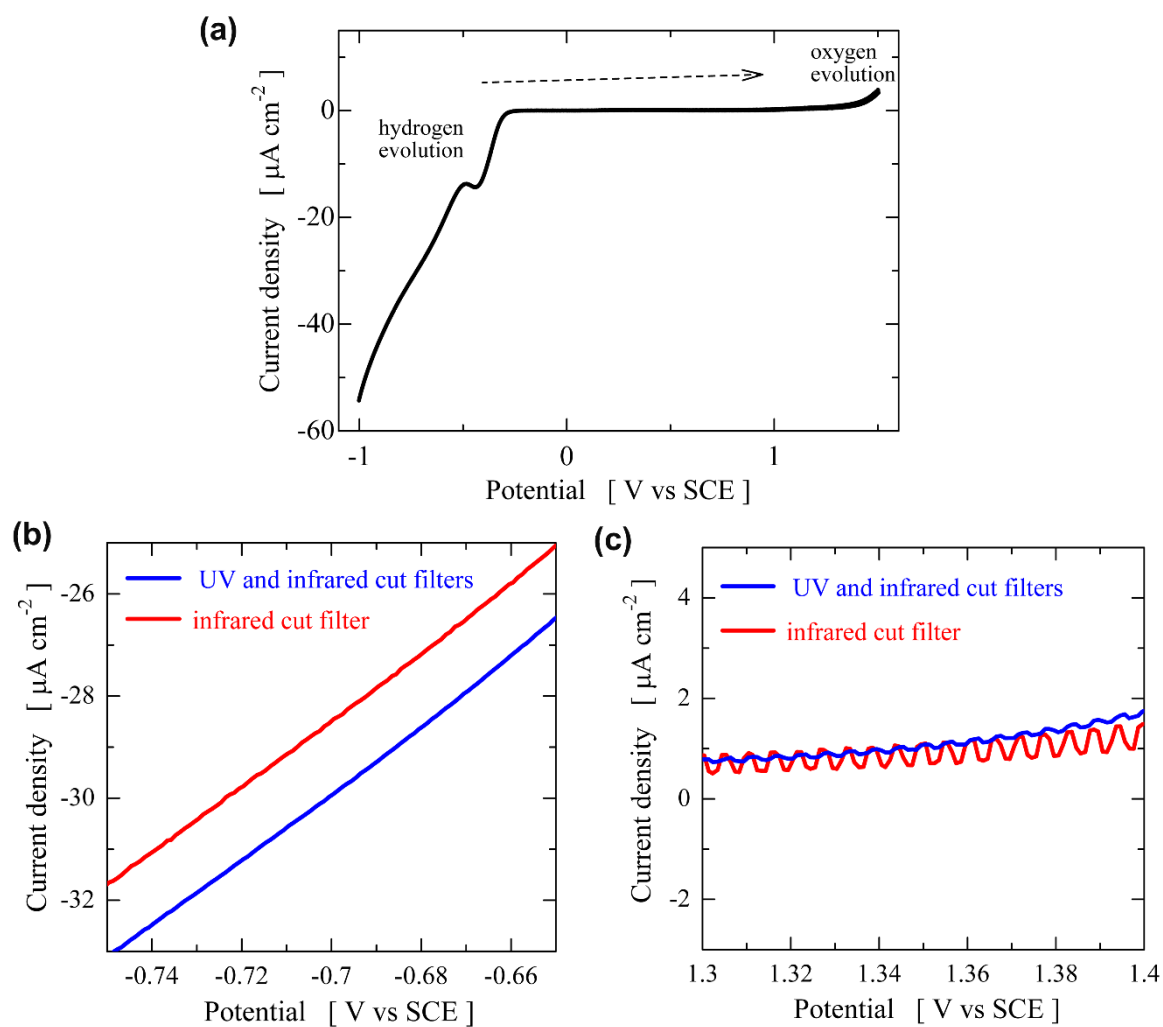

**Figure S6** (a) Change of current density with potential for the electrolysis of 0.1 M Na<sub>2</sub>SO<sub>4</sub> aqueous solution using FTO film without coating as a work electrode. The electrode was irradiated by intermittent light passed through infrared-cut filter. The applied potential was changed from -1 V to 1.5 V vs SCE. Panels (b) and (c) show the current density change in the potential ranges where hydrogen and oxygen evolution reactions occurred, respectively, for using the lights passed through infrared-cut filter and through both infrared-cut and UV-cut filters.

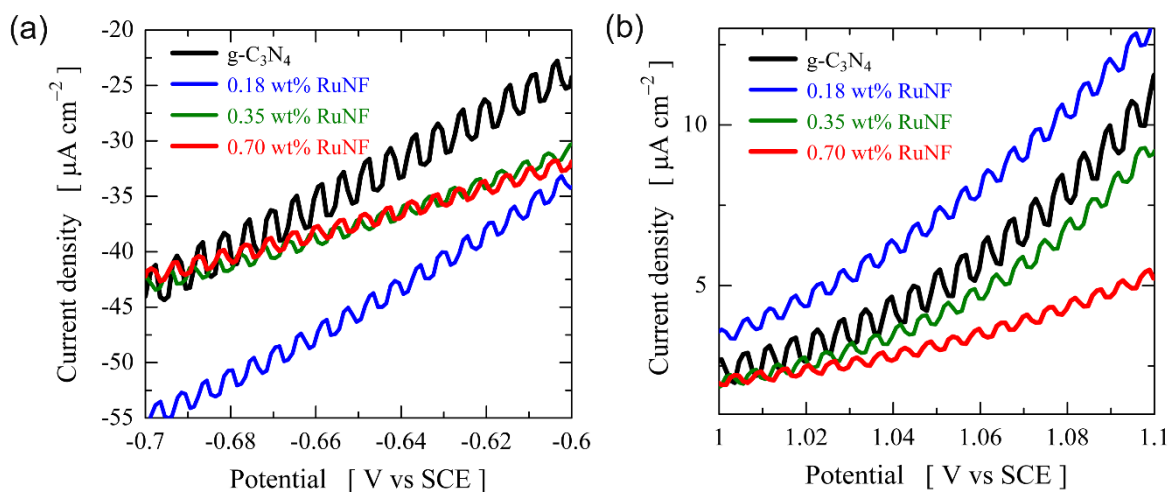

**Figure S7** Change of current density with potential for the electrolysis of 0.1 M  $\text{Na}_2\text{SO}_4$  aqueous solution with an intermittent irradiation of the light passed through both the infrared-cut and UV-cut filters. RuNF/  $\text{g-C}_3\text{N}_4$  hybrids with different RuNF contents, i.e., 0, 0.18, 0.35, and 0.70 wt% RuNF, were used as a working electrode. The applied potential was changed from -1 V to 1.5 V vs SCE. Panels (a) and (b) show the current density changes in the potential ranges where hydrogen and oxygen evolution reactions occurred, respectively.

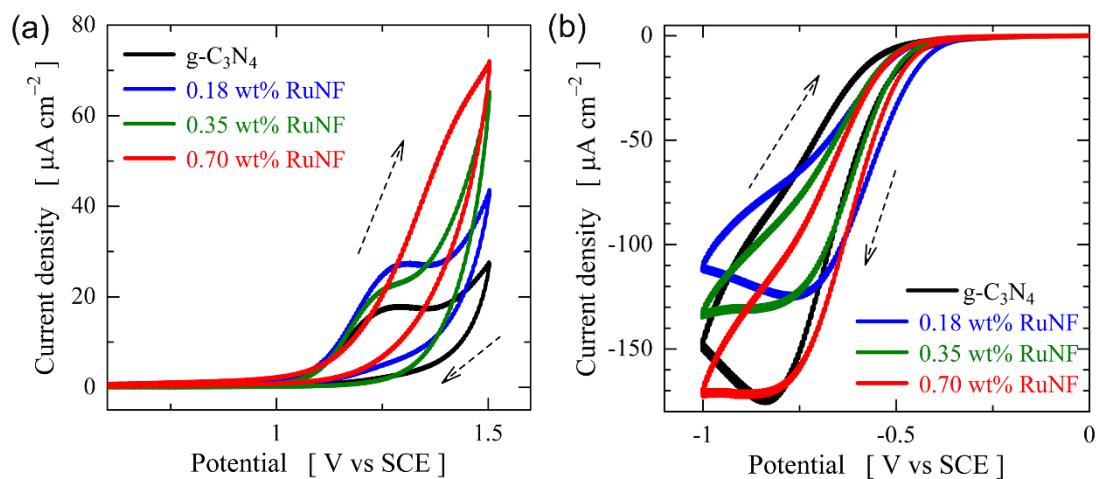

**Figure S8** Cyclic voltammograms of the electrolysis of 0.1 M  $\text{Na}_2\text{SO}_4$  aqueous solution using RuNF/  $\text{g-C}_3\text{N}_4$  hybrids with different RuNF contents, i.e., 0, 0.18, 0.35, and 0.70 wt% RuNF, as a working electrode. Panels (a) and (b) show the current density changes in the potential ranges where oxygen and hydrogen evolution reactions occurred, respectively.

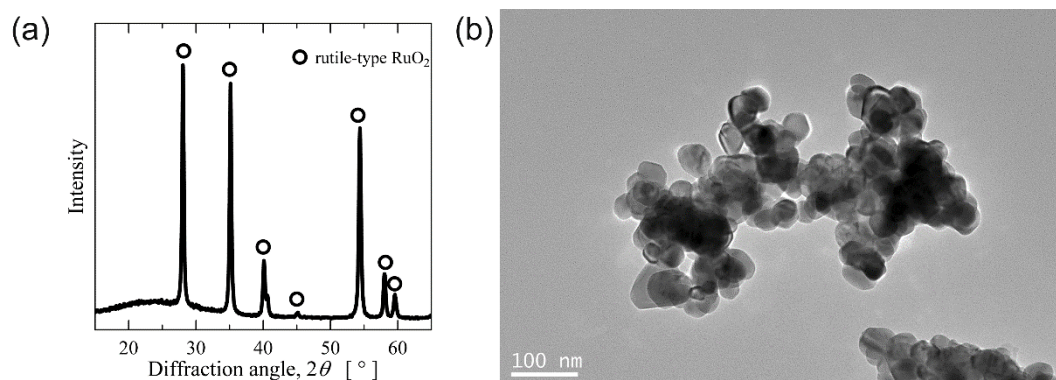

**Figure S9** (a) XRD pattern and (b) TEM image of the RuO<sub>2</sub> nanoparticles used for comparison with RuNFs

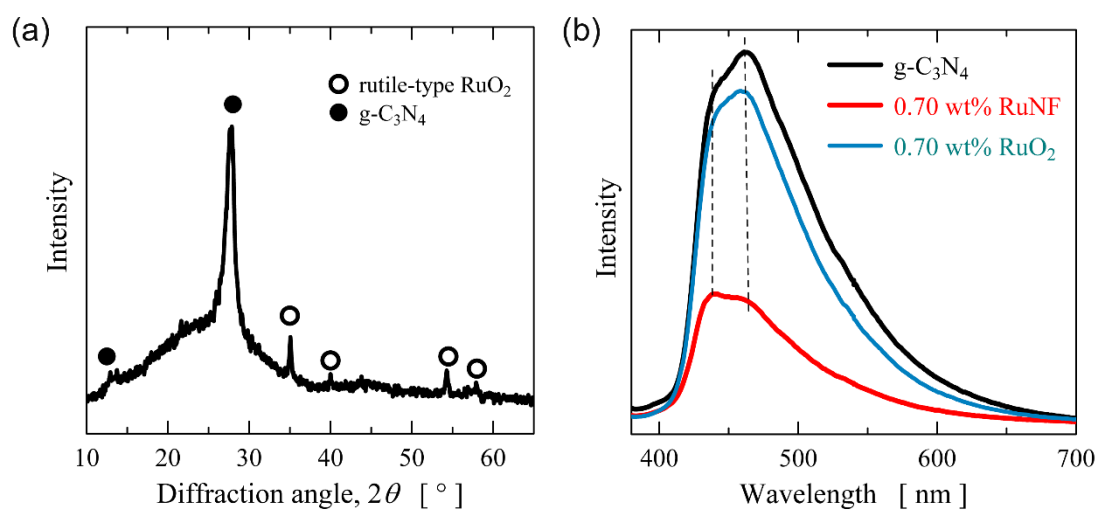

**Figure S10** (a) XRD pattern and (b) fluorescence spectrum of RuO<sub>2</sub> particle/ g-C<sub>3</sub>N<sub>4</sub> hybrid with a RuO<sub>2</sub> content of 0.70 wt%. The fluorescence spectrum was measured with an excitation wavelength of 370 nm. For comparison, the fluorescence spectra of RuNF/ g-C<sub>3</sub>N<sub>4</sub> hybrid with a RuNF content of 0.70 wt% and g-C<sub>3</sub>N<sub>4</sub> are also shown in the panel (b).

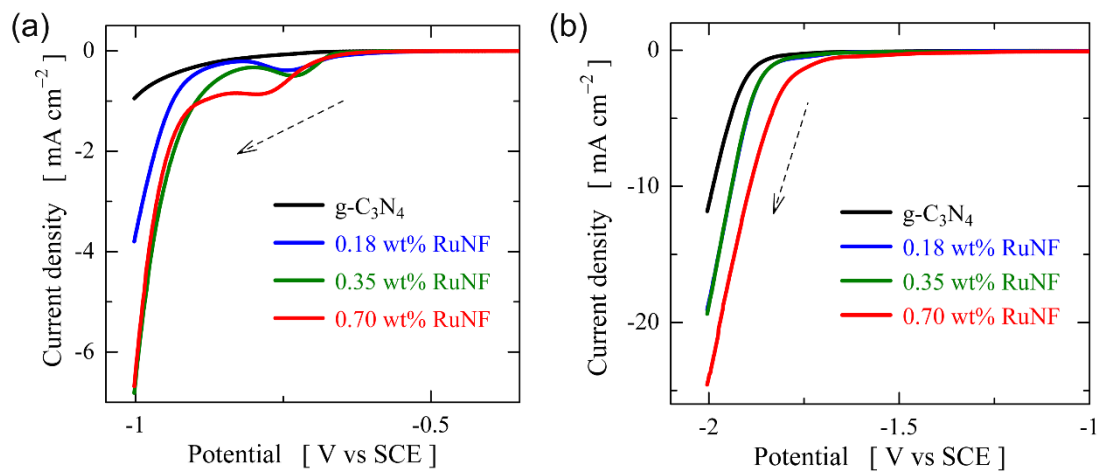

**Figure S11** Current density changes by hydrogen evolution reaction in (a) 0.5 M H<sub>2</sub>SO<sub>4</sub> aqueous solution and (b) 0.5 M NaOH aqueous solution by using RuNF/ g-C<sub>3</sub>N<sub>4</sub> hybrids with different RuNF contents, i.e., 0, 0.18, 0.35, and 0.70 wt% RuNF, as a working electrode.
